# Supplementary material for: Safe and Effective Gene Therapy for Murine Wiskott-Aldrich Syndrome Using an Insulated Lentiviral Vector
Source: PubMed Central journal article supplement — Mol Ther Methods Clin Dev. 2016 Dec 18;4:1–16. doi: 10.1016/j.omtm.2016.11.001 (PMC5363182; doi:10.1016/j.omtm.2016.11.001), 2016-12-18
Supplement: mmc1.pdf [file mmc1.pdf]

**OMTM, Volume 4**

## **Supplemental Information**

### **Safe and Effective Gene Therapy for Murine Wiskott-Aldrich Syndrome Using an Insulated Lentiviral Vector**

**Swati Singh, Iram Khan, Socheath Khim, Brenda Seymour, Karen Sommer, Matthew Wielgosz, Zachary Norgaard, Hans-Peter Kiem, Jennifer Adair, Denny Liggitt, Arthur Nienhuis, and David J. Rawlings**

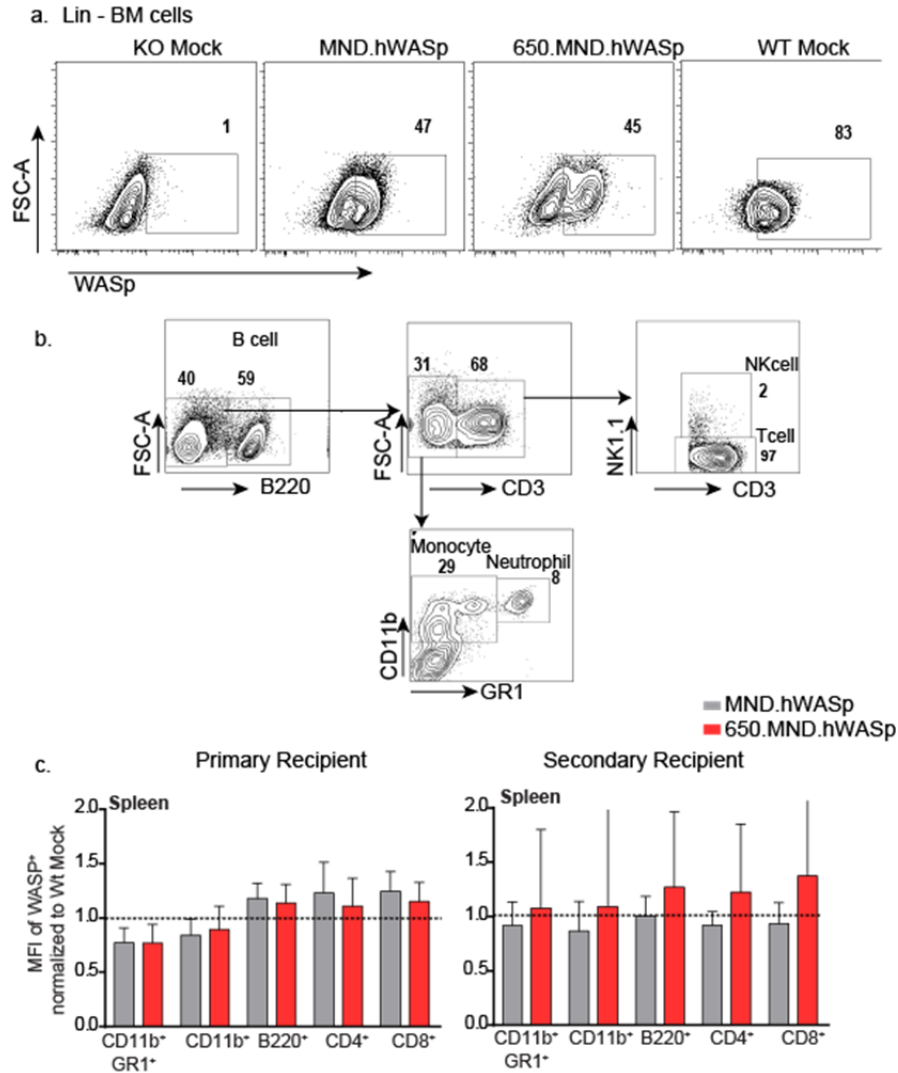

**Figure S1. LV-delivered WASp expression is similar to that of endogenous WAS across multiple hematopoietic lineages.** (a) Representative FACS plots of WASp expression after *in vitro* transduction of *Was*<sup>-/-</sup> mouse lin<sup>-</sup> BM cells with either MND.hWASp or 650.MND.hWASp LV, or mock transduced *Was*<sup>-/-</sup> (KO) or WT lin<sup>-</sup> BM cells. After transduction, cells were cultured for 7 days in StemSpan media supplemented with murine SCF and TPO cytokines. The percentage of WASp<sup>+</sup> live cells is indicated. (b) Flow cytometry gating strategy for determining hematopoietic subsets. The same antibody panel was used for peripheral blood, BM and spleen. (c) Mean fluorescence intensity (MFI) of WASp<sup>+</sup> cells in splenic hematopoietic cell subsets of primary and secondary recipients normalized to WT mock, shown as mean ± SD. For primary recipients, n = 3 (WT Mock), 5 (MND.hWASp), and 12 (650.MND.hWASp); for secondary recipients, n = 15 (WT Mock), 16 (MND.hWASp), and 50 (650.MND.hWASp).

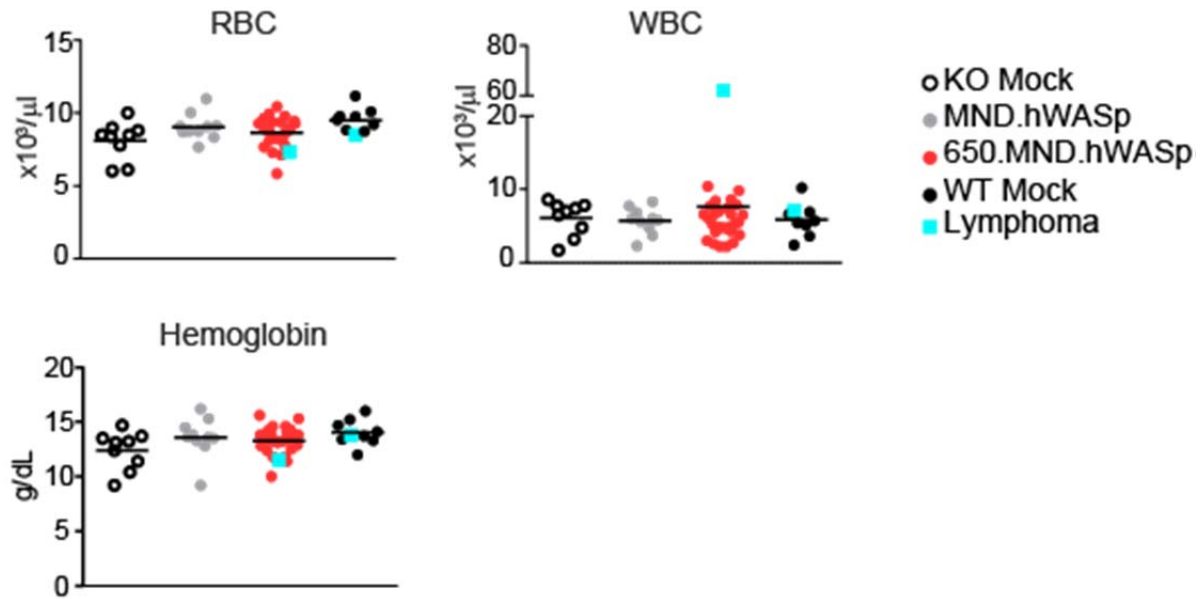

**Figure S2. Peripheral blood cell counts for primary LV and control gene therapy recipients.** Values from peripheral blood obtained 16 weeks post-transplant. Results are from 3 individual experiments; n =10 (KO Mock and MND.hWASp), 9 (WT Mock) and 29 (650.MND.hWASp). Mice with lymphomas are indicated in blue within their gene therapy cohort. RBC = Red blood cell; WBC = white blood cell.

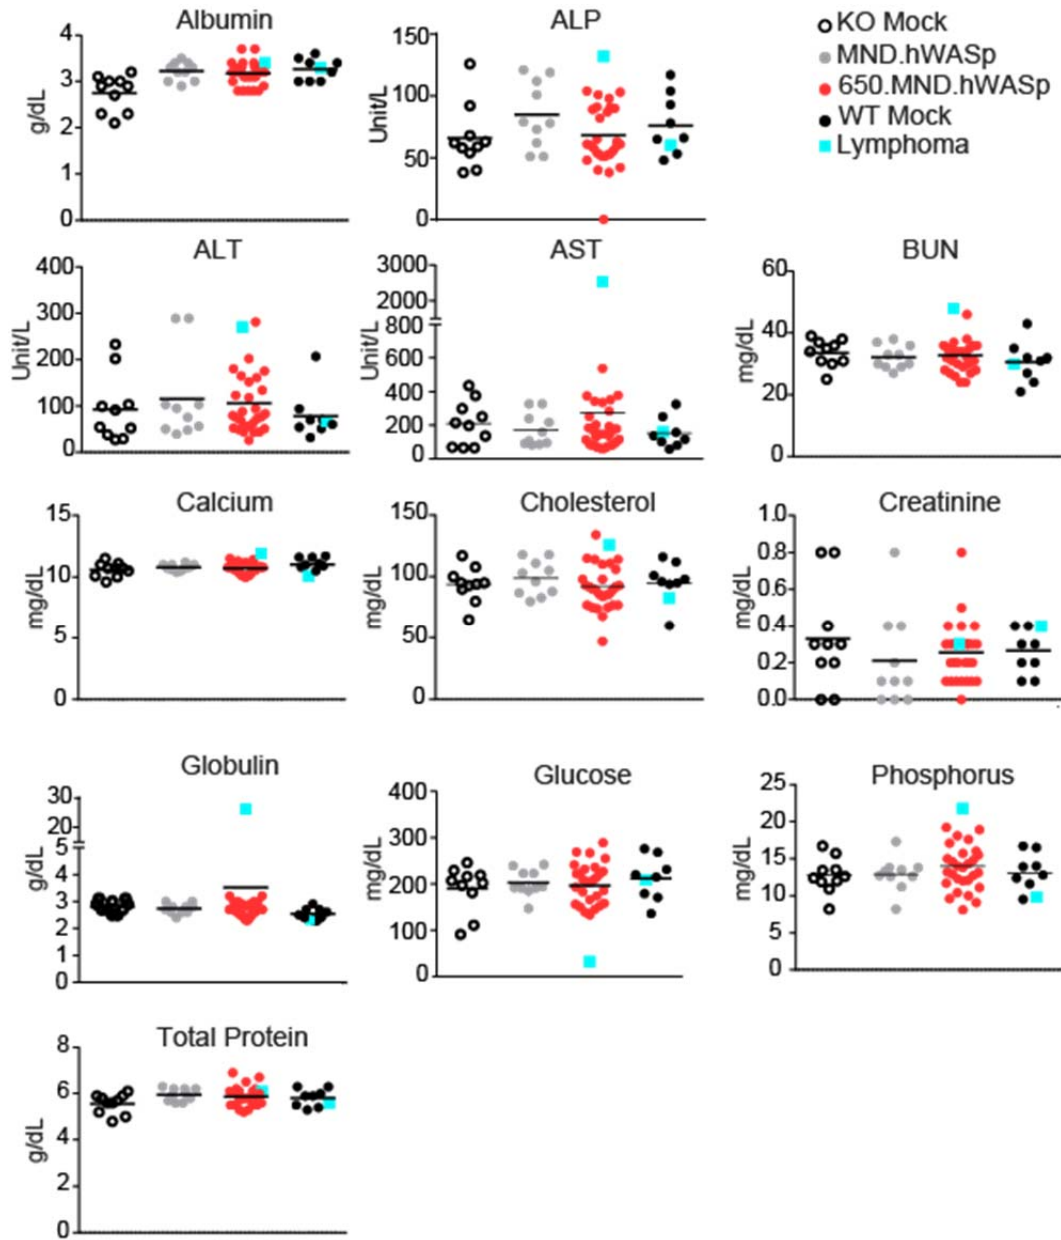

**Figure S3: Serum chemistry for primary LV and control gene therapy recipients.** Values from peripheral blood obtained 16 weeks post-transplant. Results compiled from 3 individual experiments; n = 10 (KO Mock and MND.hWASp), 9 (WT Mock) and 29 (650.MND.hWASp). Mice with lymphomas are indicated in blue within their gene therapy cohort. ALP = alkaline phosphatase; ALT = alanine aminotransferase; AST = aspartate aminotransferase; BUN = blood urea nitrogen.

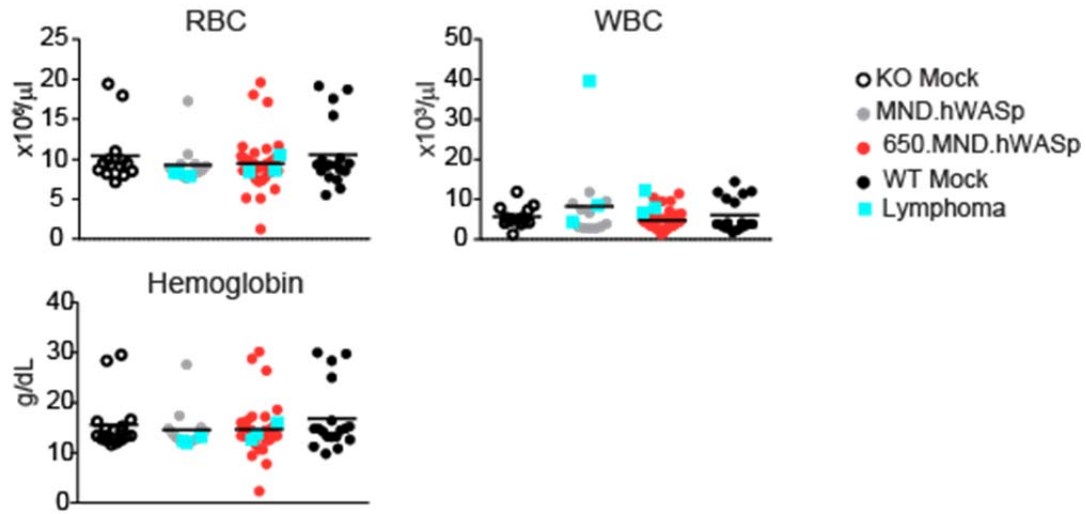

**Figure S4. Peripheral blood cell counts for secondary LV and control gene therapy recipients.** Values from peripheral blood obtained 16 weeks post-transplant. Results compiled from 3 individual experiments;  $n = 14$  (KO and MND.hWASp), 18 (WT Mock) and 52 (650.MND.hWASp). Mice with lymphomas are indicated in blue within their gene therapy cohort. RBC = Red blood cell; WBC = white blood cell.

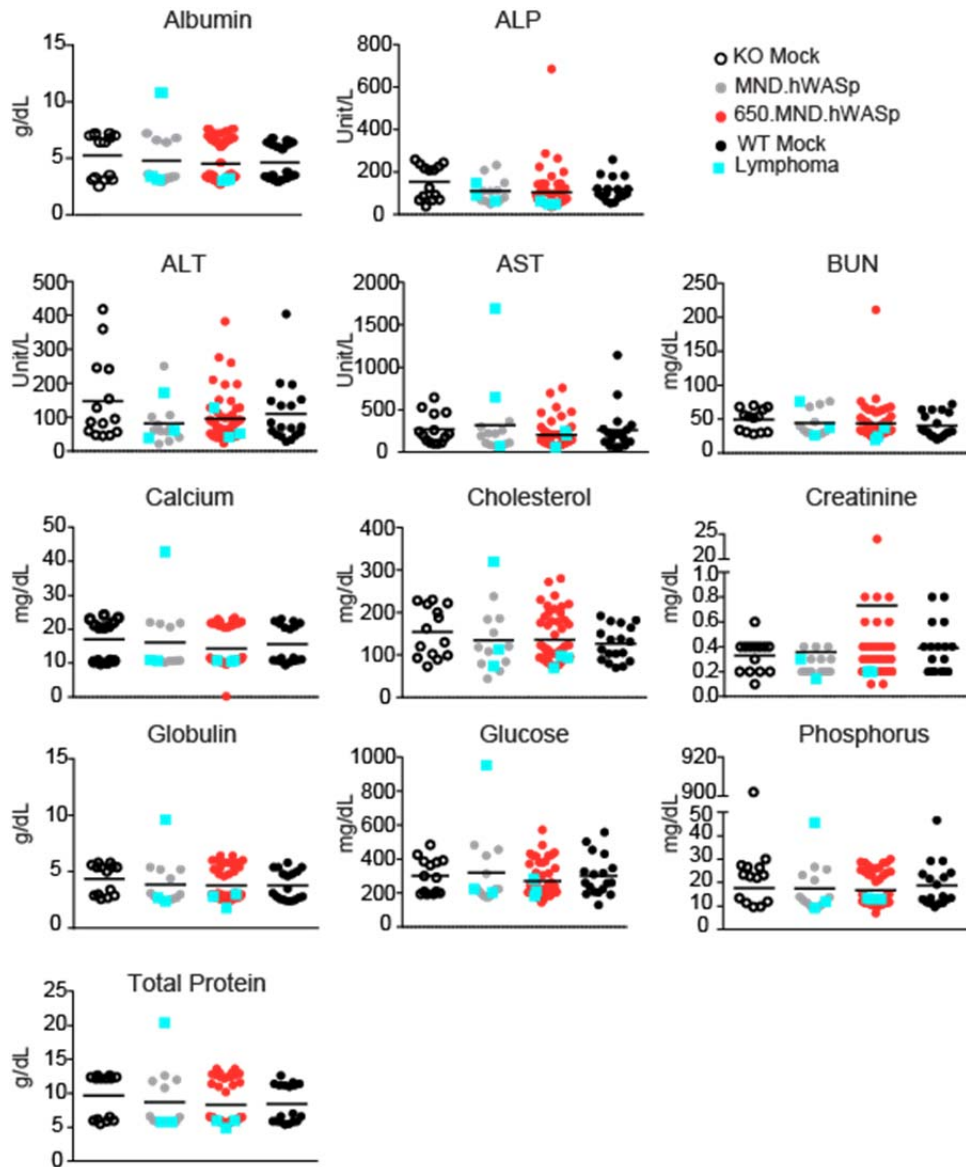

**Figure S5. Serum chemistry for secondary LV and control gene therapy recipients.** Values from peripheral blood obtained 16 weeks post-transplant. Results compiled from 3 individual experiments; n = 14 (KO and MND.hWASp), 18 (WT Mock) and 52 (650.MND.hWASp). Mice with lymphomas are indicated in blue within their gene therapy cohort. ALP = alkaline phosphatase; ALT = alanine aminotransferase; AST = aspartate aminotransferase; BUN = blood urea nitrogen.

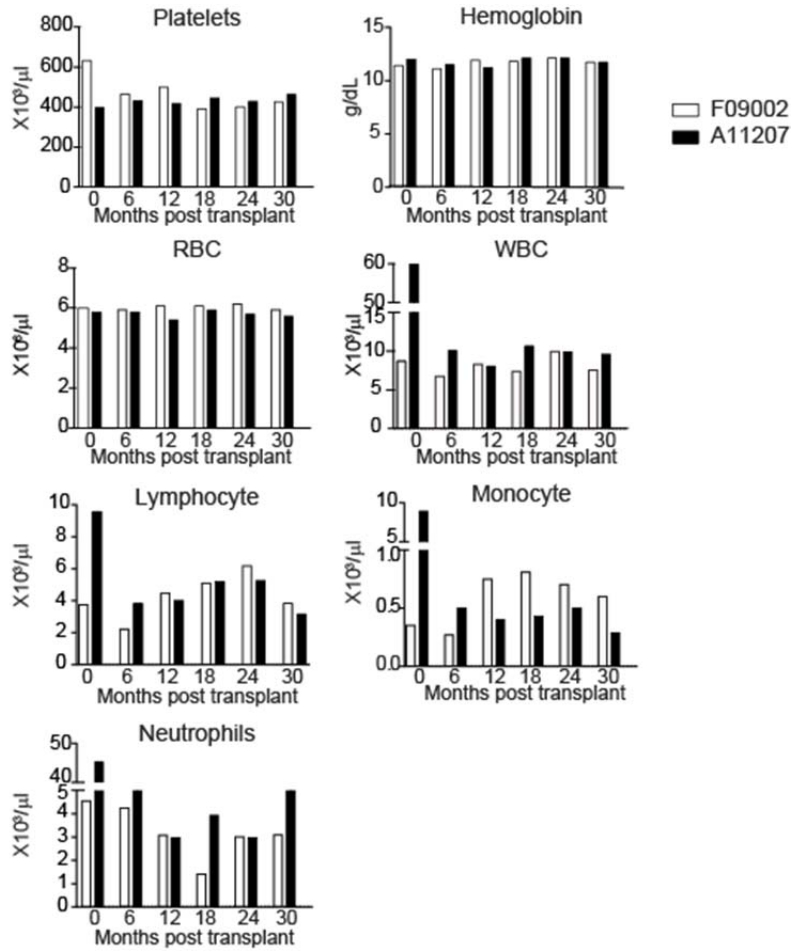

**Figure S6. Peripheral blood cell counts for non-human primates F09002 and A11207.** Time course of cell counts on the indicated month post-transplant with gene therapy treated cells. RBC = Red blood cell; WBC = white blood cell.

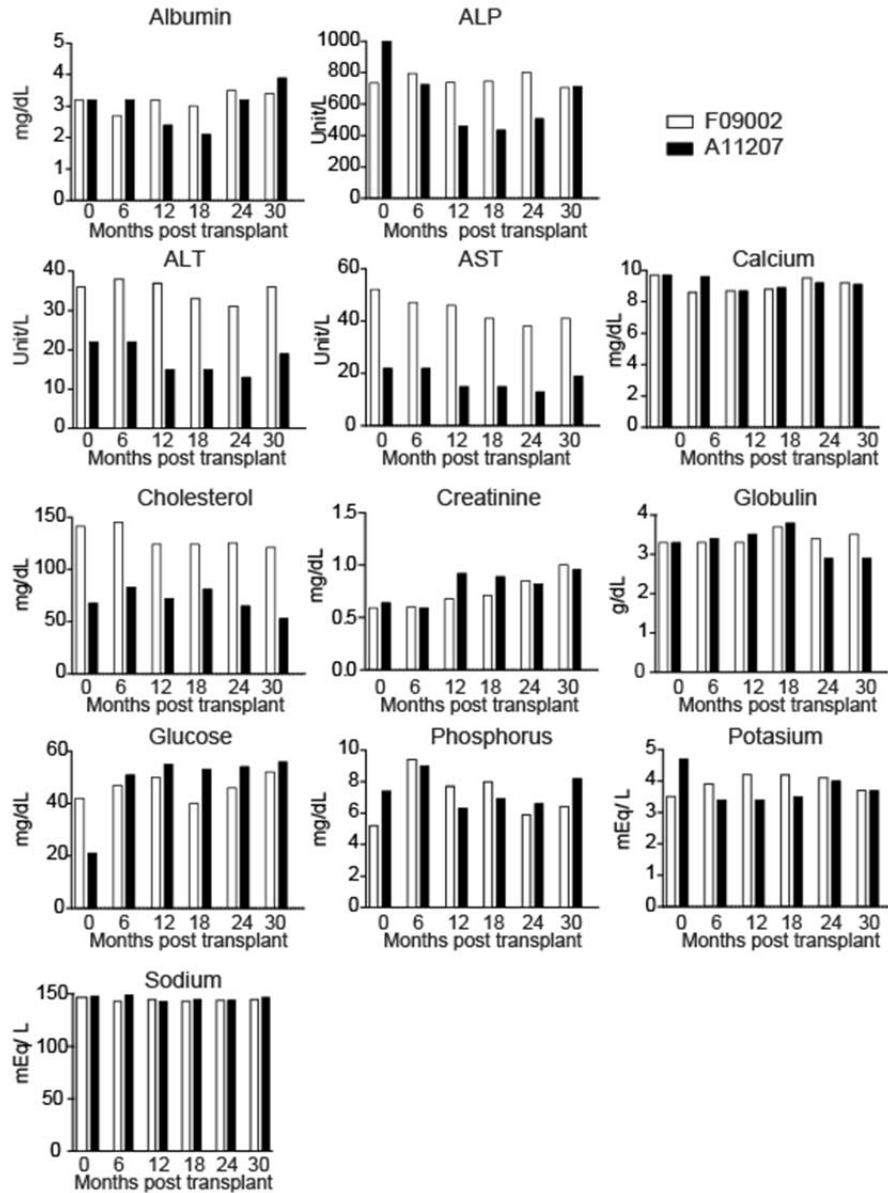

**Figure S7. Serum chemistry for non-human primates F09002 and A11207.** Time course of serum chemistry on the indicated month post-transplant with gene therapy treated cells. ALP = alkaline phosphatase; ALT = alanine aminotransferase; AST = aspartate aminotransferase; BUN = blood urea nitrogen.



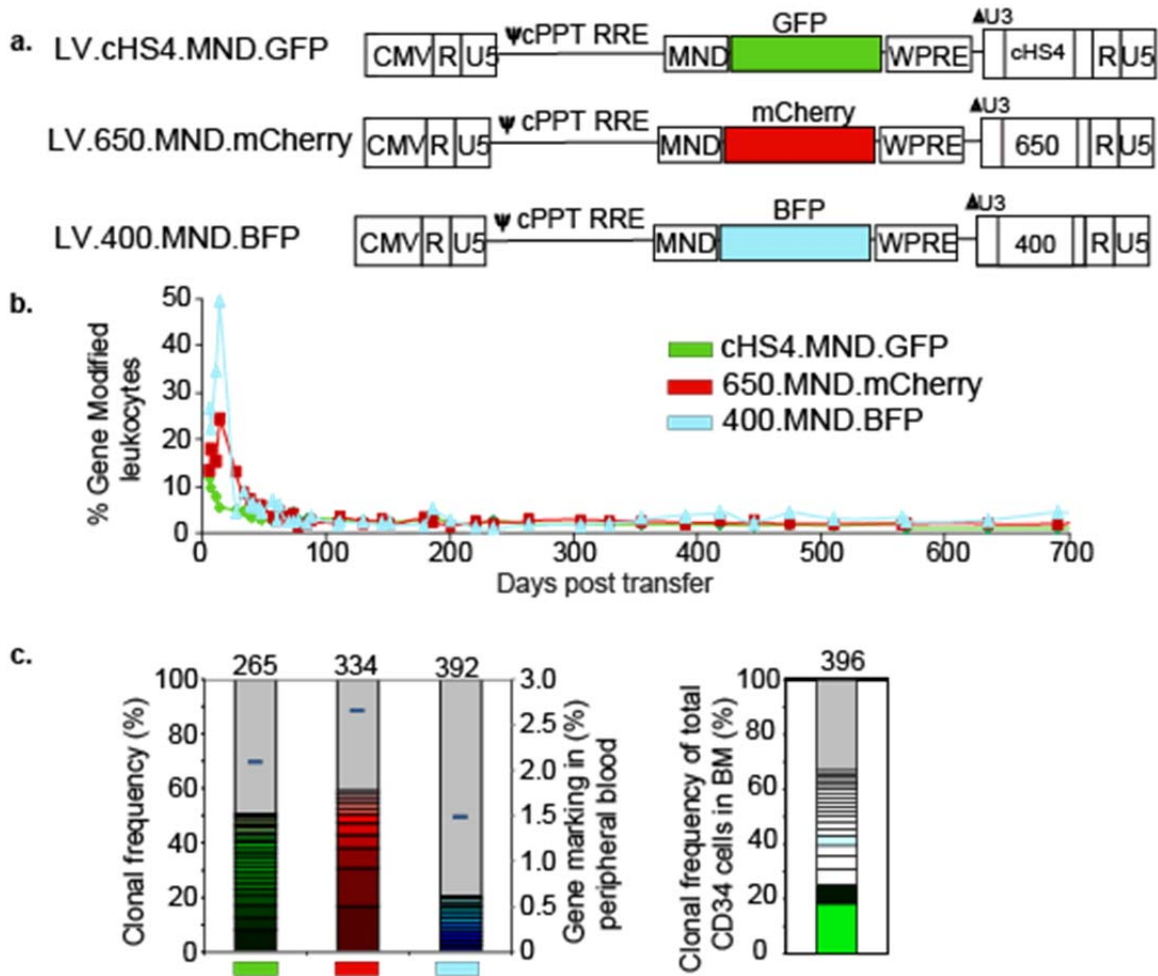

**Figure S8. Direct comparison of expression and polyclonality of insulated and non-insulated MND promoters in a non-human primate gene therapy model.** (a) Schematic diagram of the SIN-LV vectors used for this study. All LV vectors were based on the SIN LV pCL backbone. *Macaca nemestrina* #A11207 was transplanted with bone marrow transduced with three different SIN-LV MND-fluorochrome expression cassettes, each insulated using a distinct fragment of the 1.2 kb cHS4 chromatin insulating element. The GFP expression cassette was insulated by the full-length insulator, mCherry was insulated by the 650 bp cHS4 fragments, and BFP was insulated by a 400 bp fragment as described (Arumugon et al, Wielgosz et al). (b) Plot shows % lentivirus transduced leukocytes in peripheral blood vs. time post-transfer. Fluorophores are from the LV in (a) and were detected using flow cytometry. (c) Clonal diversity of sorted fluorochrome<sup>+</sup> peripheral blood (left) and BM CD34<sup>+</sup> (right) leukocytes in animal A11207 221 days (peripheral blood) or 223 days (BM CD34<sup>+</sup> cells) after transplant. The thickness of the colored bars indicates the frequency of a particular clone; clones in the gray shaded area are too infrequent to distinguish width. The total number of clones identified in each sample is listed at the top of the corresponding bar. The percentage of fluorochrome<sup>+</sup> cells within peripheral blood (right y-axis) is indicated by a dark blue bar.

### a. Animal F09002

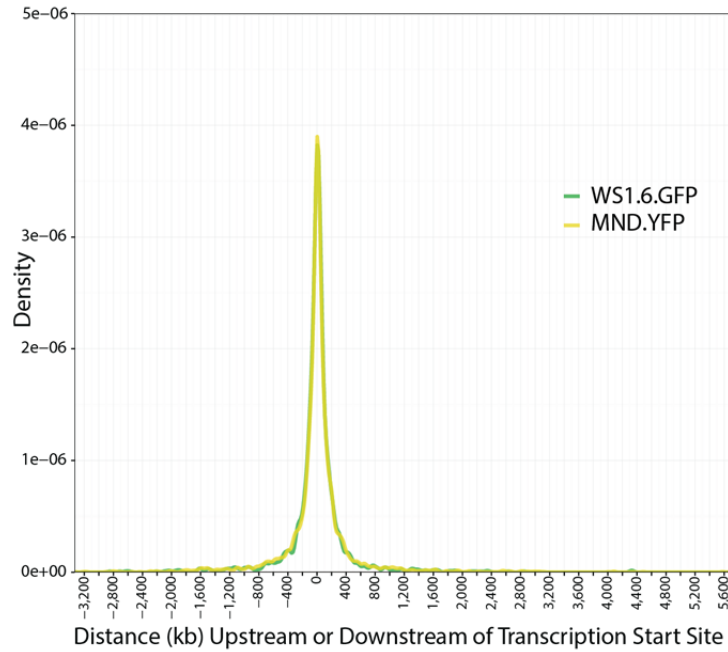

### b. Animal A11207

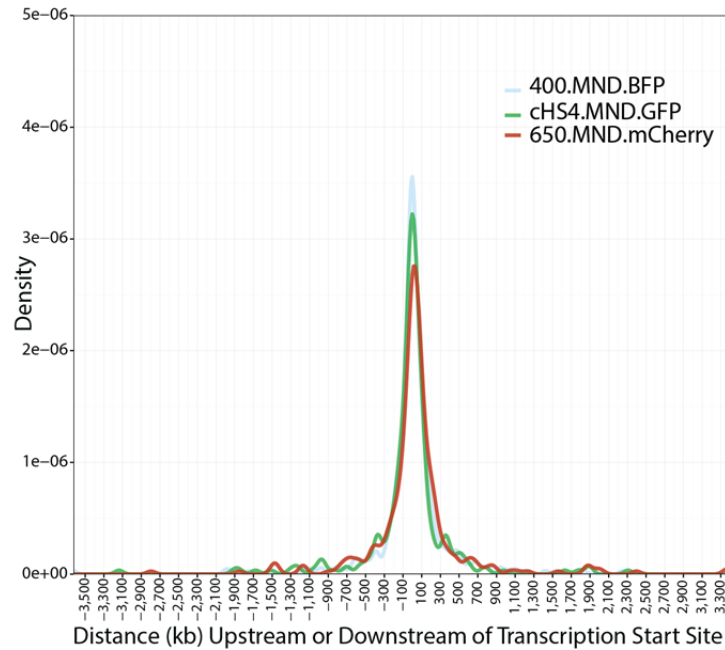

**Figure S9. Integration Site Distances to Transcription Start Sites. Integration Site Distances to Transcription Start Sites.** The probability density function was calculated using a Kernel Density Estimation (*geom\_density* function of the *ggplot2* R package) of distance between integration site and transcription start site for each fluorescent protein (colored) in subject (a) F09002 and (b) A11207. The area under the curve sums to 1. The probability of observing an integration site in any given window is given as the area under the curve between those two points on the x axis. Upstream and downstream are relative to the direction of transcription.

| <b>Group</b>   | <b>Experimentally Induced Background Lesions</b> | <b>Primary Mice Total/Affected</b> | <b>Secondary Mice Total/Affected</b> |
|----------------|--------------------------------------------------|------------------------------------|--------------------------------------|
| 650 MND hWAS-M | Rad-Pneumonitis                                  | 20/19                              | 44/37                                |
|                | Rad-Glomerulopathy                               | 20/20                              | 44/44                                |
|                | Rad-Testicular Atrophy                           | 20/19                              | 44/44                                |
|                | Collection trauma                                | 20/18                              | 44/40                                |
| 650 MND hWAS-F | Rad-Pneumonitis                                  | 10/9                               | 9/8                                  |
|                | Rad-Glomerulopathy                               | 10/9                               | 9/8                                  |
|                | Rad-Ovarian Atrophy                              | 10/10                              | 9/8                                  |
|                | Collection trauma                                | 10/9                               | 9/7                                  |
| KO Mock-M      | Rad-Pneumonitis                                  | 7/7                                | 3/3                                  |
|                | Rad-Glomerulopathy                               | 7/7                                | 3/3                                  |
|                | Rad-Testicular Atrophy                           | 7/7                                | 3/3                                  |
|                | Collection trauma                                | 7/7                                | 3/3                                  |
| KO Mock-F      | Rad-Pneumonitis                                  | 3/2                                | 11/8                                 |
|                | Rad-Glomerulopathy                               | 3/3                                | 11/11                                |
|                | Rad-Ovarian Atrophy                              | 3/1                                | 11/11                                |
|                | Collection trauma                                | 3/3                                | 11/10                                |
| WT Mock-M      | Rad-Pneumonitis                                  | 5/4                                | 6/6                                  |
|                | Rad-Glomerulopathy                               | 5/5                                | 6/6                                  |
|                | Rad-Testicular Atrophy                           | 5/5                                | 6/6                                  |
|                | Collection trauma                                | 5/4                                | 6/6                                  |
| WT Mock-F      | Rad-Pneumonitis                                  | 4/3                                | 9/9                                  |
|                | Rad-Glomerulopathy                               | 4/3                                | 9/9                                  |
|                | Rad-Ovarian Atrophy                              | 4/4                                | 9/9                                  |
|                | Collection trauma                                | 4/2                                | 9/7                                  |

**Table S1.** Background histopathology lesions identified in the murine gene therapy controls. Rad = lesions found in all cohorts receiving total body irradiation.

| Days Post Transplant | Chromosome | Locus of Integration (bp) | Nearest Oncogene TSS (kb) | Nearest TSS Oncogene Name | IS Genomic Feature      |
|----------------------|------------|---------------------------|---------------------------|---------------------------|-------------------------|
| 96                   | 5          | 146057509-146057541       | 69.4                      | <b>FBXW7</b>              | <b>Intronic (FBXW7)</b> |
|                      | 11         | 62386621-62386439         | 33.0                      | WIF1                      | Intronic (WIF1)         |
| 221                  | 1          | 60908469-60908512         | 1210.8                    | JUN                       | Intergenic              |
|                      | 4          | 37524395-37524458         | 142.1                     | HMGA1                     | Intergenic              |
|                      | 7          | 144707316-144707370       | 124.2                     | GTF2A1                    | Intronic (TSHR)         |
|                      | 8          | 95057086-95057034         | 128.0                     | NBN                       | Intergenic              |
|                      | 11         | 63162615-63162678         | 38.0                      | HMGA2                     | Intronic (HMGA2)        |
|                      | 12         | 60750713-60750671         | 68.4                      | SF3B1                     | Intergenic              |
|                      | 13         | 132794273-132794169       | 110.7                     | ERCC3                     | Intergenic              |
|                      | 13         | 47318184-47318119         | 171.7                     | FBXO11                    | Intergenic              |
|                      | 13         | 61658259-61658311         | 51.5                      | XPO1                      | Intergenic              |
|                      | 15         | 89202976-89203017         | 1652.1                    | GNAQ                      | Intergenic              |
|                      | 20         | 4182934-4182988           | 202.3                     | CREBBP                    | Intergenic              |
|                      | X          | 154605195-154605319       | 29.8                      | MTCP1NB                   | Intronic (MTCP1)        |
|                      | 392        | 5                         | 146057509-146057541       | 69.4                      | <b>FBXW7</b>            |
| 7                    |            | 129555065-129554970       | 25.7                      | GPHN                      | Intronic (GPHN)         |
| 11                   |            | 48069006-48069149         | 3.4                       | ATF1                      | Intronic (ATF1)         |
| 14                   |            | 114860698-114860772       | 194.0                     | ZBTB16                    | Intergenic              |
| 16                   |            | 32431104-32431030         | 99.4                      | CDK12                     | Intergenic              |
| 16                   |            | 62004778-62004811         | 58.0                      | DDX5                      | Intergenic              |
| 20                   |            | 65374479-65374403         | 62.8                      | CBFB                      | Intronic (CBFB)         |

**Table S2. Lentivirus insertion sites associated with known oncogenes for animal A11207.** Genes proximal to the integration sites identified at different time points (96, 221 and 392 days after transplant) are shown. Yellow highlight shows clones with identical integration sites. TSS= Transcription start site, IS= integration site.

| <b>Mouse antigen:</b>                | <b>Fluorophore</b> | <b>Clone</b>                           | <b>Supplier</b>   |
|--------------------------------------|--------------------|----------------------------------------|-------------------|
| B220                                 | QDot 655           | RA3-6B2                                | Life Technologies |
| CD11b                                | FITC               | M1/70                                  | eBioscience       |
| GR-1                                 | eFluor450          | RB6-8C5                                | eBioscience       |
| NK1.1                                | PE                 | PK163                                  | Biologend         |
| CD3                                  | APC-Cy7            | 17A2                                   | eBioscience       |
| CD45.2                               | Pe-Cy7             | 104                                    | Southern BioTech  |
| CD45.1                               | APC                | A20                                    | eBioscience       |
| CD62L                                | APC                | MEL-14                                 | eBioscience       |
| CD25                                 | FITC               | PC61                                   | Biologend         |
| CD44                                 | APC-Cy7            | IM7                                    | Biologend         |
| CD8                                  | PE                 | 53- 6.7                                | eBioscience       |
| CD4                                  | PerCp-Cy5.5        | GK1.5                                  | Biologend         |
| CD45.1                               | Pacific Blue       | A20                                    | eBioscience       |
| CD23                                 | APC                | B3B4                                   | Life Technologies |
| CD21                                 | PE                 | 7G6                                    | BD Bioscience     |
| CD45.1                               | FITC               | A20                                    | eBioscience       |
| CD24                                 | Pacific Blue       | M1/69                                  | Biologend         |
| Sca-1                                | PerCp-Cy5.5        | D7                                     | eBioscience       |
| c-Kit                                | PE                 | 2B8                                    | eBioscience       |
| CD41                                 | FITC               | MWReg30                                | BD Bioscience     |
| Mouse hematopoietic lineage cocktail | eFluor450          | 17A2, RA3-6B2, M1/70, TER-119, RB6-8C5 | eBioscience       |
| WASp                                 |                    |                                        | Hans Ochs         |
| F(ab') <sub>2</sub> anti-rabbit IgG  | Alexa568           | polyclonal                             | Life Technologies |

**Table S3.** List of antibodies used for flow cytometry.
